# Supplementary material for: Physiological Effects of Water Flow Induced Swimming Exercise in Seabream Sparus aurata
Source: Front Physiol. 2020 Dec 7;11:610049. doi: 10.3389/fphys.2020.610049 (PMC7750471; doi:10.3389/fphys.2020.610049)
Supplement: Supplementary file 1 [file Table_1.xlsx]

## Sheet: Table S1
Supplementary Table S1: Differentially expressed genes in the comparison of fish swimming at 1 BL s-1 vs. controls.
ID	Description	Fold change	P value
Sa_14971.3.1	collagen alpha-1(XXII) chain isoform X1	0.0551133	0.000354156
Sa_26952.1.1	sodium channel type 4 subunit alpha B-like isoform X2	0.0601751	0.00219087
Sa_9719.6.1	rab5 GDP GTP exchange factor-like	3.94443	0.00245667
Sa_7559.3.10	kinase D-interacting substrate of 220 kDa isoform X1	0	0.00318506
Sa_22569.1.1	baculoviral IAP repeat-containing 6 isoform X4	0.219512	0.00324579
Sa_35438.1.1	glutathione peroxidase 3	5.1209	0.00342483
Sa_13966.3.1	UPF0454 C12orf49 homolog	6.75511	0.00408486
Sa_189.2.1	troponin skeletal muscle	3.53396	0.00411557
Sa_9588.3.1	ankyrin repeat and SOCS box 10 isoform X2	0.277202	0.00422704
Sa_14211.1.1	unconventional myosin-XVIIIa isoform X5	0.421173	0.004463
Sa_26026.4.1	transmembrane 145	0.127459	0.0044958
Sa_41427.1.1	MHC class II antigen beta partial	2.79506	0.00488926
Sa_8796.3.1	GTP-binding 2	0.421985	0.00531329
Sa_23853.7.1	kelch 31	0.491003	0.00685666
Sa_47571.1.1	transmembrane 100-like	2.87685	0.0076143
Sa_47558.1.1	Chloride transport 6	0.161153	0.00779932
Sa_10066.5.1	myostatin	0.523373	0.00825966
Sa_2642.1.1	MTSS1 isoform X1	0.396013	0.00917168
Sa_18605.2.1	ankyrin repeat domain-containing 24 isoform X1	3.93292	0.00923622
Sa_50456.1.1	laminin subunit beta-1-like	3.39133	0.0097519
Sa_5883.1.1	myosin heavy fast skeletal muscle-like	2.57732	0.0105369
Sa_22214.6.1	transcription initiation factor TFIID subunit 10	2.79772	0.0108968
Sa_30954.1.1	malate cytoplasmic isoform X1	1.9689	0.0109049
Sa_14754.1.1	Collagen alpha-6(VI) chain	2.39326	0.0126661
Sa_16736.1.1	sodium channel type 4 subunit alpha B-like	0.447503	0.0127538
Sa_20069.1.2	zinc finger 804A	4.32043	0.0132599
Sa_3949.3.1	Nuclear pore complex Nup133	15.6378	0.0140871
Sa_13121.1.1	poly [ADP-ribose] polymerase 14-like	Inf	0.0143576
Sa_8665.1.1	paxillin-like isoform X3	0.36795	0.0155525
Sa_19821.4.1	filamin-A-interacting 1-like	4.98984	0.0157727
Sa_32547.2.1	apolipo C-I-like	2.27348	0.0161685
Sa_5425.1.1	HLA class II histocompatibility antigen gamma chain	1.83373	0.017379
Sa_7350.2.1	phosphatidylinositol 3,4,5-trisphosphate-dependent Rac exchanger 1	0.227742	0.0187335
Sa_42188.1.1	growth arrest and DNA damage-inducible GADD45 beta-like	0.264465	0.0187465
Sa_39637.1.1	IQ motif and SEC7 domain-containing 1 isoform X3	4.36391	0.0191925
Sa_29221.2.1	5 -AMP-activated kinase subunit gamma-1-like	2.60529	0.0199164
Sa_20706.16.1	calcium-binding and coiled-coil domain-containing 1-like	0.456263	0.0205923
Sa_6193.8.1	insulin-like growth factor 2 mRNA-binding 2 isoform X1	0.152436	0.0221558
Sa_15173.2.1	myosin regulatory light chain skeletal muscle isoform-like	1.90966	0.0237474
Sa_4060.3.1	ras-related C3 botulinum toxin substrate 2	2.64637	0.0247526
Sa_5352.4.1	retinol-binding 2	3.1093	0.0247552
Sa_7559.2.1	DNA-binding inhibitor ID-2	3.66726	0.0257154
Sa_27719.1.1	kelch-like ECH-associated 1	0.503978	0.0262551
Sa_374.2.1	potassium voltage-gated channel subfamily F member 1-like	3.65301	0.0267975
Sa_26858.4.1	angiopoietin-related 4-like	0.471361	0.0271869
Sa_18411.1.1	DM-related transcriptional factor Dmrt2b	2.51763	0.0272567
Sa_14608.1.1	ATP-binding cassette sub-family G member 2-like	6.44966	0.0275681
Sa_33932.2.1	angiopoietin-1	2.05989	0.0275886
Sa_43099.1.1	NLRC3-like isoform X1	0.0730748	0.027689
Sa_44146.1.1	multimerin-2 isoform X2	0.39507	0.0284477
Sa_47539.2.1	DNA-directed RNA polymerase II subunit RPB1- partial	0.364744	0.0286114
Sa_37816.1.1	protrudin isoform X1	0.347741	0.0287811
Sa_52294.1.1	plexin-B1-like	0.329611	0.0291433
Sa_31543.3.1	prostaglandin F synthase-like	2.74987	0.0303703
Sa_4069.2.1	14 kDa phosphohistidine phosphatase	3.2457	0.0325915
Sa_54637.1.1	doublesex- and mab-3-related transcription factor 2	5.38775	0.0336891
Sa_19297.4.1	MAP3K7 C-terminal	10.9662	0.0337245
Sa_12493.1.1	multiple epidermal growth factor-like domains 10	0.2219	0.0338241
Sa_9260.1.1	ribosomal S6 kinase delta-1	0	0.0338463
Sa_10480.1.1	translation initiation factor IF-2-like	1.87587	0.0339006
Sa_7347.2.1	serine threonine- phosphatase 2A 55 kDa regulatory subunit B delta isoform	0.441796	0.0347626
Sa_19422.1.1	C-myc promoter-binding -like isoform X4	0.441469	0.0357233
Sa_47928.1.1	supervillin-like isoform X1	0.512214	0.0359952
Sa_16089.2.4	coenzyme Q-binding COQ10 homolog mitochondrial	0	0.0360617
Sa_39352.1.1	phosphatidylinositol 4-phosphate 3-kinase C2 domain-containing subunit beta	0.412157	0.0365672
Sa_12401.2.1	rho guanine nucleotide exchange factor 40-like isoform X1	0.303722	0.0366323
Sa_18455.1.1	cordon-bleu isoform X5	0.548002	0.0366677
Sa_20880.3.1	pro-cathepsin H	2.88326	0.0372757
Sa_30494.1.1	anoctamin-1-like isoform X2	0.555485	0.0390271
Sa_614.4.1	alpha-tectorin	0.263877	0.039186
Sa_6948.1.1	multidrug resistance-associated 4 isoform X1	0.323386	0.0398692
Sa_25410.5.1	kelch 41	Inf	0.039986
Sa_7002.2.1	pterin-4-alpha-carbinolamine dehydratase 2	0.069707	0.0404742
Sa_23962.1.1	rap1 GTPase-GDP dissociation stimulator 1-like	Inf	0.0407246
Sa_12710.1.1	A-kinase anchor 13-like isoform X1	0.0995097	0.0412626
Sa_11418.3.1	large neutral amino acids transporter small subunit 4-like isoform X1	0.525966	0.0416588
Sa_4209.3.12	#NAME?	Inf	0.0422947
Sa_15837.2.1	interferon regulatory factor 9	8.13782	0.0424857
Sa_12538.4.2	cullin-4A	0.0964672	0.0429332
Sa_39170.1.1	Multidrug resistance-associated 4	0.527398	0.0433385
Sa_12870.1.1	tuberin isoform X1	0.53448	0.0434125
Sa_4364.1.1	fibrinogen alpha chain	17.509	0.0444284
Sa_4266.3.1	growth hormone receptor 2	0	0.0447018
Sa_35509.2.1	myosin heavy partial	2.28263	0.045357
Sa_15681.3.1	phospholipid phosphatase 6	0.302778	0.0454856
Sa_10922.15.1	leukocyte receptor cluster member 1	0.205586	0.0461363
Sa_35615.1.1	NFX1-type zinc finger-containing 1	7.72574	0.0464015
Sa_4956.1.1	E3 ubiquitin- ligase MARCH7 isoform X1	0.519508	0.0473485
Sa_23116.1.1	carbohydrate sulfotransferase 12	2.24443	0.0475201
Sa_31874.1.1	dystrobrevin beta isoform X1	0.556404	0.0475757
Sa_12586.1.1	teneurin-3 isoform X1	0	0.0481409
Sa_19194.2.1	probable ATP-dependent RNA helicase DDX28	2.70811	0.0485552
Sa_28906.2.1	guanylyl cyclase-activating 2-like	0.405752	0.0486754
Sa_28375.1.1	rho-related GTP-binding Rho6	0	0.0489776
Sa_12110.3.1	C-C chemokine receptor type 7	13.9599	0.0494806
Sa_8782.2.1	inositol-trisphosphate 3-kinase A	0.556842	0.049926
#REF!	#REF!
