# Supplementary material for: Physiological Effects of Water Flow Induced Swimming Exercise in Seabream Sparus aurata
Source: Front Physiol. 2020 Dec 7;11:610049. doi: 10.3389/fphys.2020.610049 (PMC7750471; doi:10.3389/fphys.2020.610049)
Supplement: Supplementary file 2 [file Table_2.xlsx]

## Sheet: Table S2
Supplementary Table S2: Differentially expressed genes in the comparison of fish swimming at 2 BL s-1 vs. controls.
ID	Description	Fold change	P value
Sa_13624.2.2	phosphatase 1 regulatory subunit 27-like	0.104904	0.000243223
Sa_23937.1.1	myomegalin isoform X8	3.96118	0.000271823
Sa_23936.2.1	myomegalin-like isoform X3	3.03238	0.000670647
Sa_55100.1.1	L-serine dehydratase L-threonine deaminase	0.227931	0.00197125
Sa_11458.3.1	bifunctional methylenetetrahydrofolate dehydrogenase mitochondrial-like	0.51049	0.00201558
Sa_26026.4.1	transmembrane 145	0.136302	0.0020795
Sa_25410.5.1	kelch 41	Inf	0.00284247
Sa_9394.12.1	nuclear distribution nudE-like 1-B	0.451811	0.00478833
Sa_6462.1.1	palmitoyltransferase ZDHHC2 isoform X2	0.491776	0.00813286
Sa_28298.1.1	myomegalin-like isoform X4	3.61907	0.00888004
Sa_41427.1.1	MHC class II antigen beta partial	2.41755	0.00909699
Sa_16833.1.1	dynamin-2-like isoform X1	0.247567	0.00916572
Sa_33932.2.1	angiopoietin-1	2.15479	0.0094192
Sa_18411.1.1	DM-related transcriptional factor Dmrt2b	2.82676	0.00996559
Sa_2642.1.1	MTSS1 isoform X1	0.377656	0.0100615
Sa_19149.1.1	UPF0711 C18orf21 homolog	1.78995	0.0105223
Sa_18455.1.1	cordon-bleu isoform X5	0.561144	0.0111364
Sa_25541.1.1	transposase element L1Md-A101 L1Md-A102 L1Md-A2	Inf	0.0113078
Sa_25048.6.1	smoothelin-like	0.121911	0.0116152
Sa_27160.1.1	sodium channel type 4 subunit alpha B-like	0.402875	0.0116684
Sa_26858.1.1	guanidinoacetate N-methyltransferase	0.586983	0.0125781
Sa_8399.8.1	caspase-8-like	7.85659	0.0136769
Sa_16423.1.1	dual specificity phosphatase 22-A-like	1.82268	0.0138235
Sa_52057.3.1	basic helix-loop-helix transcription factor scleraxis-like	0.49736	0.0139745
Sa_16719.2.1	galectin-3-like isoform X1	0.339947	0.015192
Sa_15900.3.1	actin-related 6	3.09508	0.0161404
Sa_37592.3.1	spermine synthase	1.92464	0.0198133
Sa_35175.1.1	#NAME?	0.443745	0.0202797
Sa_52573.1.1	myocyte-specific enhancer factor 2C isoform X1	0.436544	0.021618
Sa_28211.1.1	kelch 24	1.70753	0.0222815
Sa_7642.7.1	solute carrier family 22 member 3-like	0.0651981	0.022348
Sa_1519.2.1	anoctamin-1-like isoform X1	0.557746	0.0224261
Sa_38632.1.1	rap guanine nucleotide exchange factor 3-like isoform X1	Inf	0.0237605
Sa_6834.8.1	very-long-chain 3-oxoacyl- reductase-B-like	Inf	0.0237605
Sa_38045.1.1	histone H2B	9.29114	0.0247225
Sa_35184.1.1	prostaglandin F2 receptor negative regulator	0.528287	0.026486
Sa_30999.1.1	kin of IRRE 1 isoform X1	17.083	0.0266237
Sa_21446.6.1	zinc finger and SCAN domain-containing 22-like isoform X1	2.76788	0.0267765
Sa_9934.1.1	kinase suppressor of Ras 1 isoform X1	0.16292	0.0271489
Sa_25635.3.1	N-acetylated-alpha-linked acidic dipeptidase	3.38171	0.0273268
Sa_15829.2.1	DNA ligase 1-like	0.170756	0.0281244
Sa_30494.1.1	anoctamin-1-like isoform X2	0.550287	0.02946
Sa_12313.1.1	granzyme B-like	4.003	0.0301967
Sa_39344.1.3	anoctamin-1-like isoform X1	0.286566	0.0305233
Sa_255.1.1	adenylate kinase mitochondrial	0.580148	0.0307438
Sa_13400.8.1	calcineurin B homologous 1	2.47213	0.0313532
Sa_37220.2.1	HEXIM-like	1.79781	0.0323795
Sa_14240.2.1	hyaluronan and proteoglycan link 1	1.63937	0.0348747
Sa_32325.2.1	immediate early response 3-interacting 1	2.16298	0.035044
Sa_7863.1.1	dyslexia-associated KIAA0319 homolog	2.24942	0.0352549
Sa_20014.1.1	MHC class I partial	Inf	0.0365638
Sa_34372.2.1	WD repeat-containing 55	4.00877	0.0370373
Sa_19959.1.3	alanine aminotransferase 2-like isoform X1	0.227811	0.0375765
Sa_14211.1.1	unconventional myosin-XVIIIa isoform X5	0.595438	0.0377054
Sa_39750.1.1	RNA polymerase II subunit A C-terminal domain phosphatase isoform X1	3.52895	0.0380359
Sa_32268.1.1	ribonuclease kappa	1.93273	0.0398126
Sa_32595.1.1	histone-lysine N-methyltransferase 2A isoform X3	0.161881	0.0416028
Sa_16258.1.1	striatin-interacting 2 isoform X1	1.56647	0.042858
Sa_13080.3.1	kelch 33	1.65291	0.0435422
Sa_32593.2.1	calsequestrin-2-like	2.94329	0.0435939
Sa_27263.3.1	E3 ubiquitin- ligase Itchy-like	0.601426	0.043638
Sa_10337.3.1	nuclear envelope pore membrane POM 121	1.84056	0.0444451
Sa_49128.2.1	platelet-activating factor receptor-like	0.213466	0.0445176
Sa_6752.2.1	trans-1,2-dihydrobenzene-1,2-diol dehydrogenase-like	2.09238	0.0446944
Sa_31094.3.1	SGT1 homolog isoform X1	1.66802	0.0465731
Sa_33461.3.1	probable RNA-binding 19	Inf	0.0471642
Sa_183.1.1	myosin light chain kinase skeletal cardiac muscle-like isoform X1	0.624629	0.047675
Sa_3888.6.1	polyubiquitin-B	1.74938	0.0478713
Sa_49341.1.1	extracellular calcium-sensing receptor-like	Inf	0.0478763
Sa_3525.1.1	para-nitrobenzyl esterase-like	Inf	0.0478904
Sa_13187.3.1	collagen alpha-1(XI) chain-like isoform X1	2.13451	0.0480336
Sa_10430.3.1	Potassium voltage-gated channel subfamily G member 3	4.99672	0.0481703
Sa_20912.2.1	PREDICTED: uncharacterized protein C9orf40 homolog	5.10691	0.048243
Sa_11256.2.1	glutathione S-transferase A-like	0.49266	0.0491097
Sa_23793.2.1	PREDICTED: uncharacterized protein C6orf62 homolog	0.355895	0.0494128
